# Supplementary material for: Octopamine Rescues Endurance and Climbing Speed in Drosophila Clkout Mutants with Circadian Rhythm Disruption
Source: Cells. 2023 Oct 25;12(21):2515. doi: 10.3390/cells12212515 (PMC10648926; doi:10.3390/cells12212515)
Supplement: Supplementary file 1 [file cells-12-02515-s001.zip › Table S1. Data Deposit.xlsx]

## Sheet: Figure 1A
Time (min)	w1118	Clkout
267	1
237	1
296	1
281	1
344	1
377	1
362	1
394	1
214		1
184		1
154		1
267		1
237		1
296		1
344		1
277		1

## Sheet: Figure 1B
Day	w1118				Clkout
4	929.651	913.255	871.875	1024.86	335.401	447.093	411.306	506.22
5	880.595	739.727	866.229	830.231	394.563	430.902	461.914	534.776
6	803.327	828.995	777.532	774.027	426.931	475.44	436.35	447.088
7	807.927	796.765	860.191	808.595	555.87	451.791	448.159	436.771
8	736.326	686.339	660.511	824.734	584.162	576.887	586.638	597.176
11	831.083	749.995	831.083	831.197	540.269	552.279	463.555	551.732
12	801.319	722.977	792.81	801.319	499.552	553.651	598.058	543.886
13	671.879	749.995	671.879	831.197	515.283	527.13	503.545	563.432
14	678.93	590.906	742.439	634.528	478.645	473.511	478.884	511.045
15	678.93	537.418	742.439	513.112	495.001	591.535	499.947	544.031
18	662.061	830.231	697.702	750.785	573.845	398.513	454.188	426.147
19	776.2	722.977	792.81	743.2	420.026	449.449	375.433	407.495
20	662.061	714.894	697.702	750.785	393.746	421.269	442.399	441.476
21	494.872	590.906	634.528	568.605	444.496	431.851	518.034	404.608
22	513.113	537.418	492.872	478.605	452.514	436.93	503.562	480.023

## Sheet: Figure 1C
w1118	Clkout
57.572	83.447
55.535	55.853
72.847	56.007
73.479	33.524
43.92	77.368
84.5	47.721
43.428	54.938
64.799	60.16
22.509	32.987
12.665	83.952
35.279	66.058
30.234	27.651
74.992	61.455
19.538	65.655
72.775	55.066
45.465	73.673
11.842	69.792
44.221	54.576
72.789	68.915
63.56	59.008
40.795	82.953
49.545	53.302
75.856	63.02
80.708	62.161
47.562	71.962
30.869	72.628
69.002	83.712
81.692	76.795
46.029	67.832
75.343	55.057
31.519	84.886
80.542	53.483
48.569	71.213
77.483	34.883
47.037	56.32
14.997	10.021
76.495	58.495
57.278	68.14
86.514	54.831
70.367	65.337
80.491	67.298
55.612	69.473
49.046	63.703
21.444	49.001
38.823	78.864
64.489	30.02
79.479	80.908
73.67	73.145
71.875	49.261
73.083	64.432
69.241	71.829
56.597	71.475
78.753	41.598
71.778	56.096
73.59	39.366
74.961	45.559
74.063	59.786
64.473	19.977
59.489	41.481
65.125	69.34
66.936	81.465
77.167	81.581
75.736	43.011
68.822	20.932
69.193	61.194
18.454	77.904
63.556	61.849
64.252	45.863
16.286	60.19
36.683	42.877
51.472	50.716
73.633	84.688
35.488	60.999
46.411	50.604
62.054	81.924
57.91	76.633
69.147	61.784
58.155	62.511
64.407	61.956
53.339	50.559
79.87	79.87
82.349	82.349
63.042	63.042
58.163	58.163
80.908	17.506
73.145	65.748
77.368	50.082
84.688	78.224
60.999	53.395
78.625	16.399
82.683	43.844
77.374	45.415
73.917	63.481
77.602	70.478
90.987	68.717
89.087	45.941
67.89	26.518
90.89	67.171
45.678	70.799
87.89	66.774
68.79	67.967
48.981	58.482
90.001	64.298
90.89	70.538
98.78	34.566
99.012	78.625
89.022	77.602
99.01	69.458
90.01	67.747
89.01	79.424
82.953	55.879
53.302	40.165
63.02	5.918
62.161	62.019
71.962	56.093
99.012	76.756
98.012	67.414
99.122	65.63
89.176	62.086
99.101	34.102
98.001	20.858
92.312	64.56
56.789	51.559
77.789	66.225
99.003	68.999
	63.626

## Sheet: Figure 1D
Time (min)	w1118 Un	w1118 Ex	Clkout Un	Clkout Ex
228	1
198	1
188	1
268	1
277	1
348	1
328	1
364	1
269		1
339		1
319		1
352		1
399		1
425		1
452		1
468		1
102			1
72			1
160			1
210			1
277			1
267			1
257			1
247			1
102				1
148				1
210				1
245				1
235				1
225				1
264				1
306				1

## Sheet: Figure 2A
Time (min)	w1118	Clkout
219	1
254	1
234	1
264	1
340	1
310	1
355	1
370	1
123		1
93		1
169		1
154		1
219		1
204		1
254		1
285		1

## Sheet: Figure 2B
Day	w1118 Control Un				Clkout Control Un
4	602.702	655.395	732.909	733.292	337.494	381.165	357.875	337.239
5	560.465	649.163	533.107	653.994	402.635	348.107	398.595	333.005
6	536.016	520.49	434.243	534.825	334.511	384.012	351.699	417.859
7	363.473	507.108	490.899	421.995	377.808	228.109	246.851	381.288
8	554.609	571.607	558.88	540.403	377.882	343.023	289.588	285.565
11	508.616	539.235	462.366	525.501	290.703	365.447	352.046	379.511
12	541.485	428.836	524.137	437.476	328.734	274.17	333.164	384.397
13	422.876	530.463	444.961	582.109	466.979	258.386	306.443	293.372
14	556.916	562.198	523.467	527.23	291.625	281.334	357.325	440.536
15	423.357	408.484	398.429	499.449	352.827	372.93	301.075	326.127
18	414.844	459.715	497.019	543.004	273.703	251.951	286.994	366.629
19	553.746	470.037	421.056	381.93	299.424	310.231	234.688	224.977
20	429.053	494.066	439.255	403.205	303.74	330.857	273.953	337.571
21	466.072	388.345	438.755	353.494	324.368	275.221	294.202	314.989
22	417.632	405.594	430.239	413.734	285.842	325.024	362.194	287.793

## Sheet: Figure 2C
w1118 Control Un	Clkout Control Un
11.031	50.438
58.912	38.151
70.268	27.726
37.387	56.116
31.201	31.37
30.777	49.421
29.001	56.605
58.743	26.031
67.133	43.503
48.404	25.807
48.234	51.116
52.048	49.59
33.319	39.845
69.082	16.963
53.319	18.234
22.895	15.777
39.449	17.726
52.556	28.997
53.234	75.257
54.59	74.336
71.201	31.54
63.63	8.319
53.319	25.098
22.218	60.008
87.472	17.556
46.963	17.363
58.234	33.503
82.048	23.489
80.777	48.15
64.675	63.234
33.065	40.099
47.98	17.048
69.336	69.138
72.556	15.191
74.845	39.936
25.099	10.181
55.692	30.526
67.218	15.777
83.178	40.353
27.302	8.743
84.845	50.952
72.133	7.472
72.98	50.438
41.285	38.151
76.54	79.76
6.37	76.116
93.912	41.201
58.771	41.932
59.929	45.946
91.088	47.472
37.811	29.675
51.794	41.031
48.037	44.336
75.777	58.2
52.218	53.392
81.116	39.929
50.071	39.944
86.54	44.336
41.37	31.54
82.387	8.319
37.98	45.098
83.178	60.008
56.879	14.929
79.562	3.107
38.997	3.74
49.251	2.811
25.268	28.815
50.777	33.489
80.466	68.15
59.251	63.234
44.336	31.951
89.506	7.048
66.455	69.138
70.692	5.191
72.302	59.936
56.966	10.181
9.929	14.76
86.709	3.658
94.251	69.589
55.692	15.777
71.879	40.353
84.675	50.952
40.692	73.624
82.387	61.995
40.692	55.174
39.588	63.256
56.794	3.828
48.15	50.866
73.912	79.924
91.427	23.234
62.839	58.362
29.845	52.714
84.929	22.218
22.895	26.031
85.89	15.438
79.76	62.857
61.031	69.759
83.404	25.946
78.573	65.265
84.986	32.133
23.065	56.178
63.065	68.658
81.54	36.198
46.709	31.201
55.833	62.472
77.867	24.251
81.116	68.056
49.845	21.116
32.302	17.218
36.116	29.845
84.308	43.743
78.997	5.353
89.76	31.637
33.658	12.472
70.014	33.573
42.641	24.082
43.573	35.438
60.466	40.353
42.302	28.815
46.285	33.489
43.743	28.997
	14.251
	28.815
	33.489
	65.15
	63.234
	59.936
	25.183
	10.181
	30.526
	57.749
	63.589
	45.257
	44.336

## Sheet: Figure 2D
Time (min)	w1118 Control Un	w1118 Control Ex	Clkout Control Un	Clkout Control Ex
181	1
171	1
232	1
212	1
274	1
264	1
323	1
338	1
181		1
171		1
232		1
212		1
274		1
264		1
338		1
328		1
149			1
119			1
181			1
171			1
232			1
212			1
202			1
263			1
149				1
119				1
89				1
181				1
232				1
212				1
202				1
214				1

## Sheet: Figure 3A
Time (min)	Clkout Control Ex	Clkout ControlUn	Clkout OA feeding Ex	Clkout OA feeding Un
149	1
119	1
81	1
181	1
232	1
212	1
264	1
254	1
149		1
119		1
81		1
181		1
179		1
264		1
254		1
244		1
268			1
258			1
334			1
324			1
378			1
368			1
494			1
511			1
268				1
258				1
334				1
378				1
368				1
439				1
451				1
511				1

## Sheet: Figure 3B
Time (min)	w1118 Control Ex	w1118 Control Un	w1118 OA feeding Ex	w1118 OA feeding Un
268	1
334	1
378	1
401	1
439	1
461	1
494	1
511	1
228		1
198		1
188		1
268		1
248		1
274		1
264		1
341		1
268			1
258			1
334			1
324			1
378			1
401			1
439			1
494			1
268				1
334				1
378				1
401				1
439				1
429				1
461				1
451				1

[truncated: 22 more sheets: Figure 3C, Figure 3D, Figure 4A, Figure 4B, Figure 4C, Figure 4D, Figure 5A, Figure 5B, Figure 6A, Figure 6B, Figure 6C, Figure 6D, Supplemental Figure 1A, Supplemental Figure 1B, Supplemental Figure 1C, Supplemental Figure 2B, Supplemental Figure 3A, Supplemental Figure 3B, Supplemental Figure 4A, Supplemental Figure 4B …]
